# Supplementary figures and images for: Tuning self-renewal in the Arabidopsis stomatal lineage by hormone and nutrient regulation of asymmetric cell division
Source: eLife journal article supplement (doi:10.7554/elife.63335), 2021-03-19

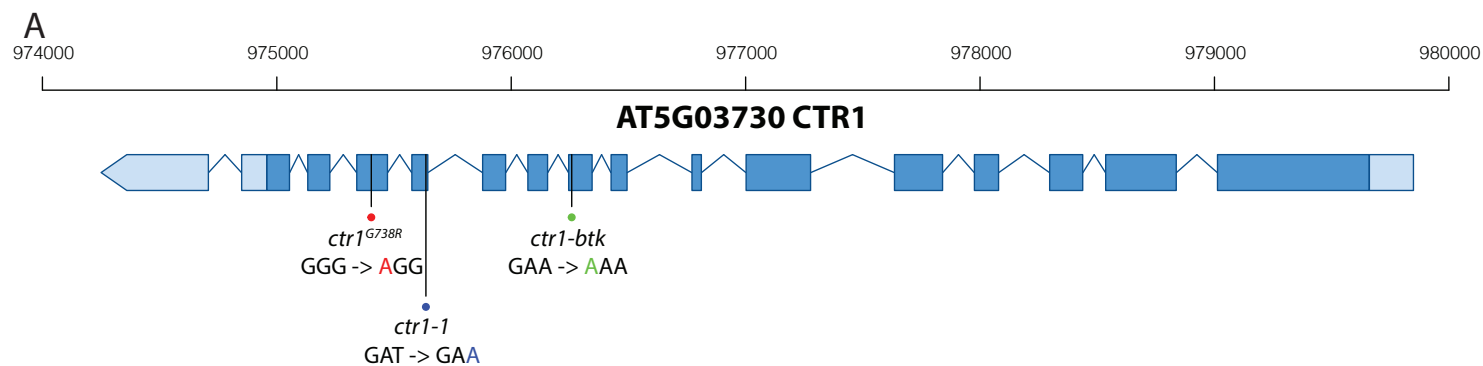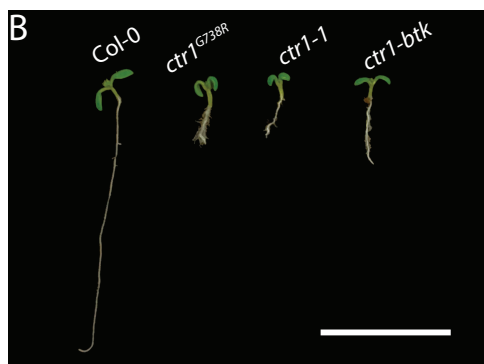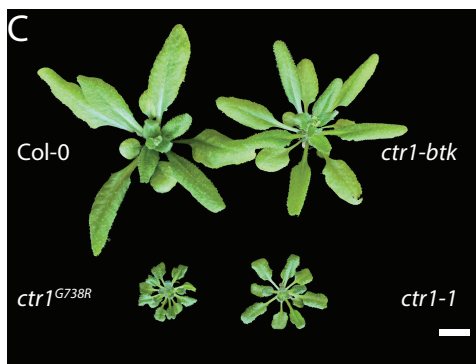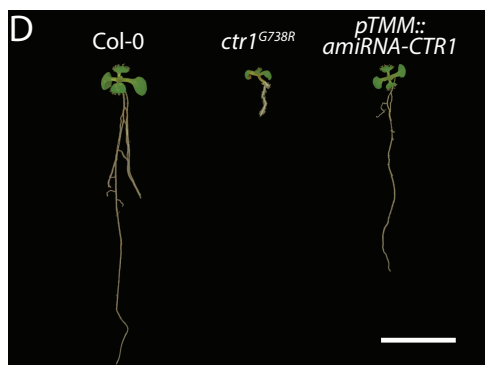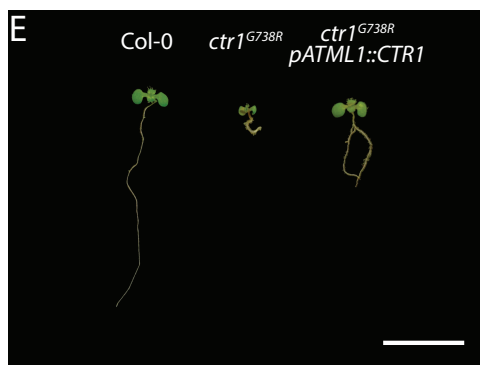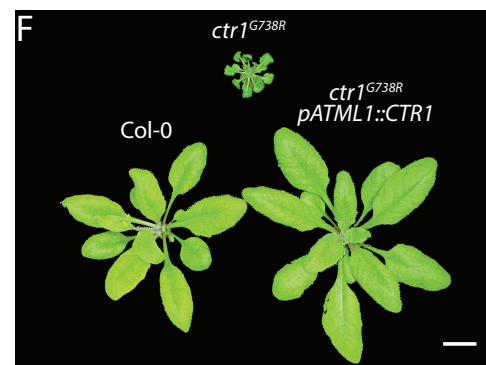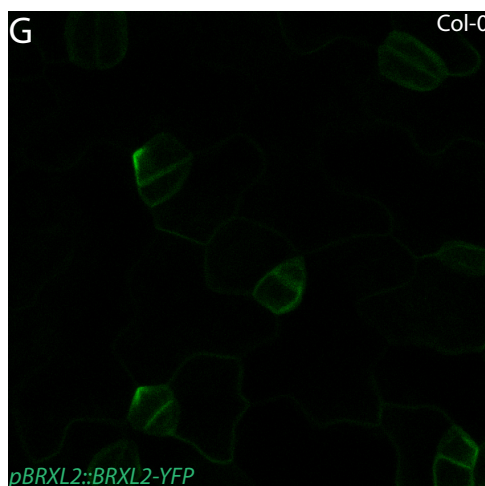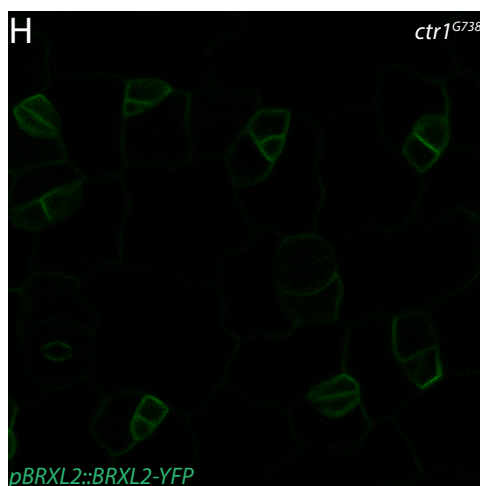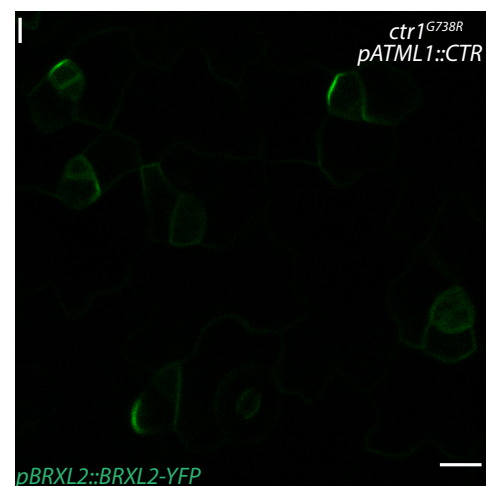

Supplement: supp [file elife_poa_e63335_Figure_1_figure_supplement_1.pdf › elife_poa_e63335_Figure_1_figure_supplement_1.pdf]

A

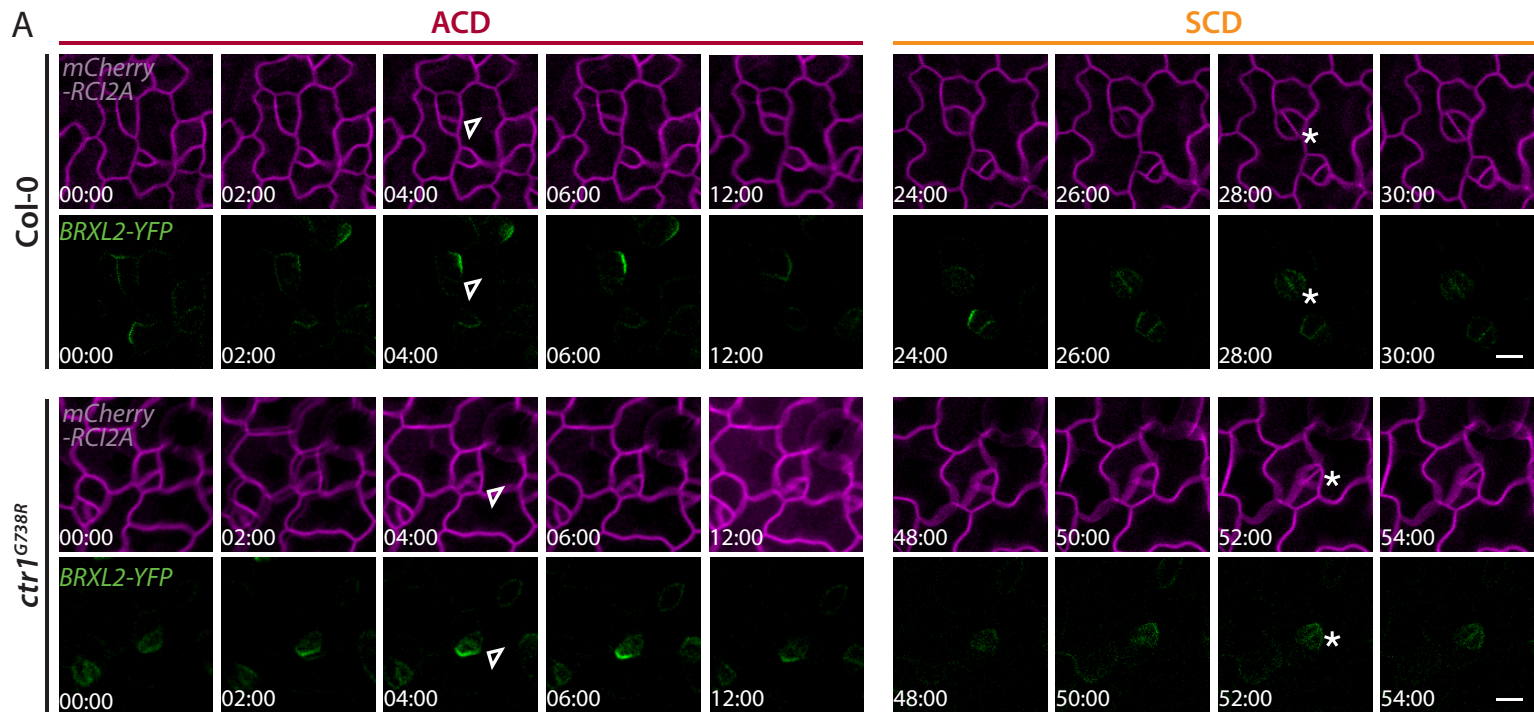

B

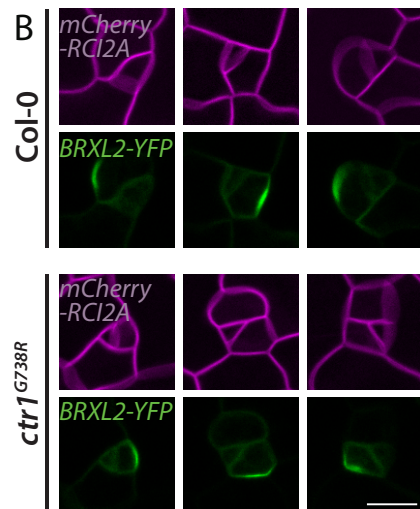

C

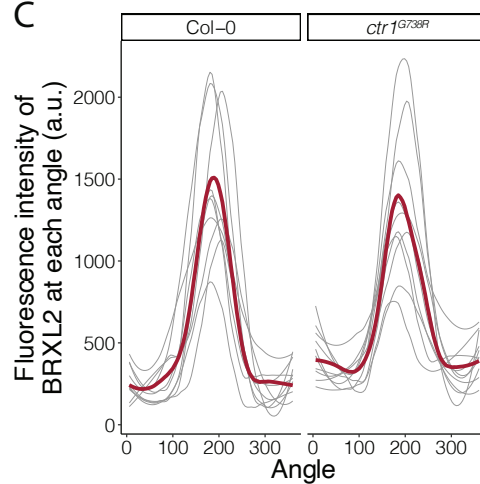

D

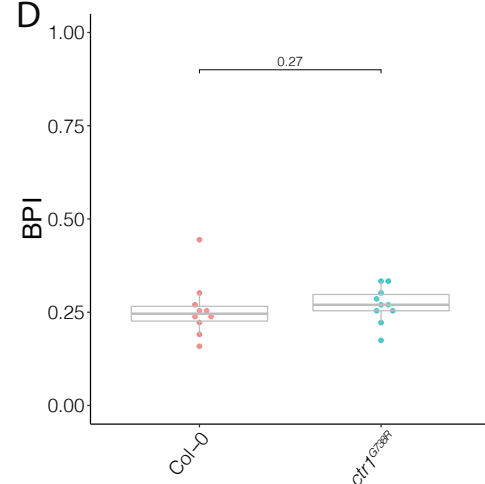

Supplement: supp [file elife_poa_e63335_Figure_1_figure_supplement_2.pdf › elife_poa_e63335_Figure_1_figure_supplement_2.pdf]

A

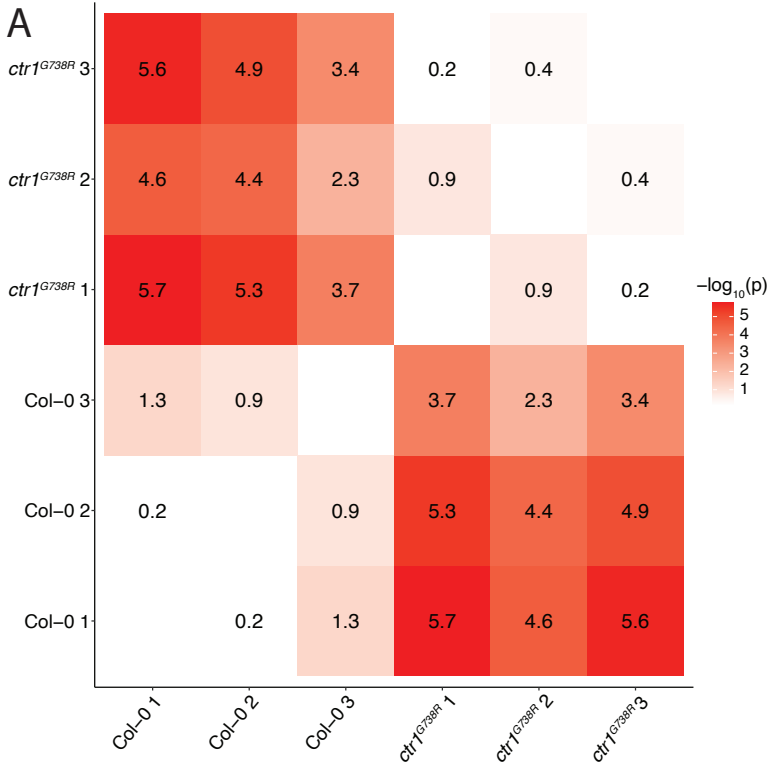

Supplement: supp [file elife_poa_e63335_Figure_1_figure_supplement_3.pdf › elife_poa_e63335_Figure_1_figure_supplement_3.pdf]

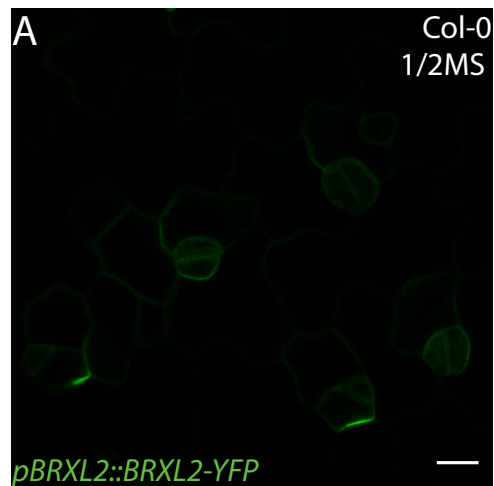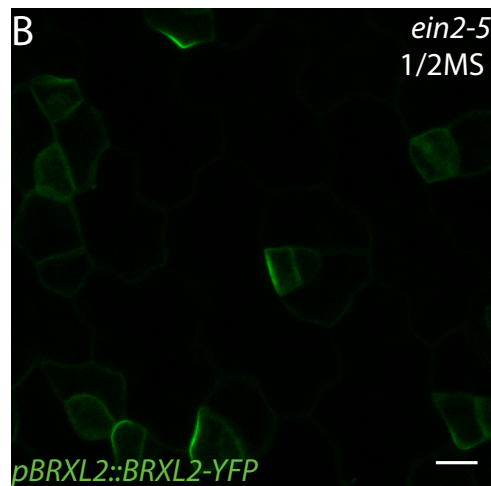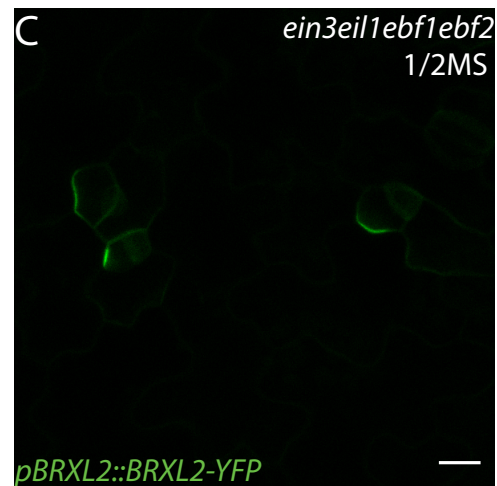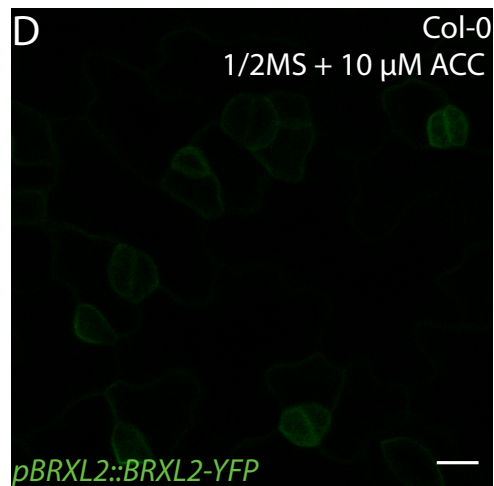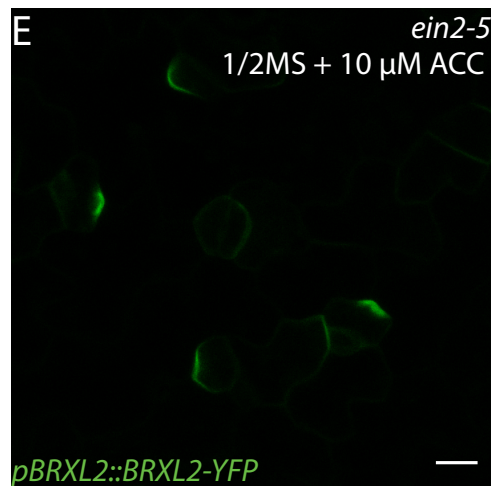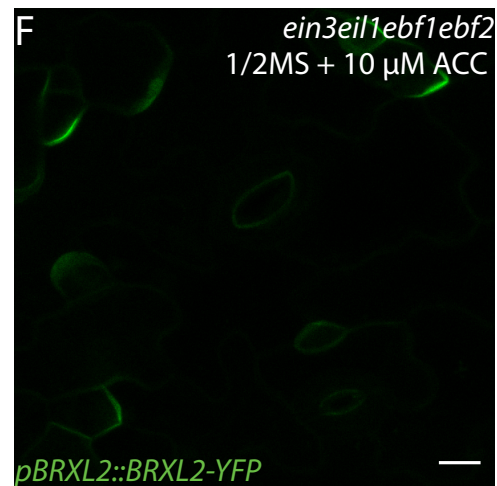

Supplement: supp [file elife_poa_e63335_Figure_2_figure_supplement_1.pdf › elife_poa_e63335_Figure_2_figure_supplement_1.pdf]

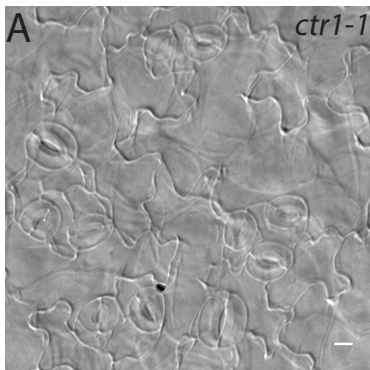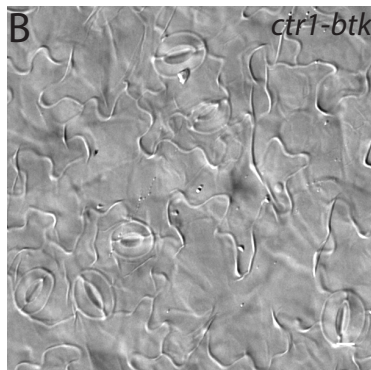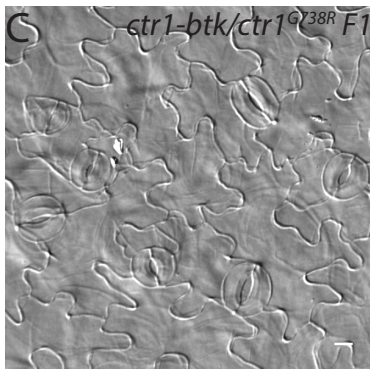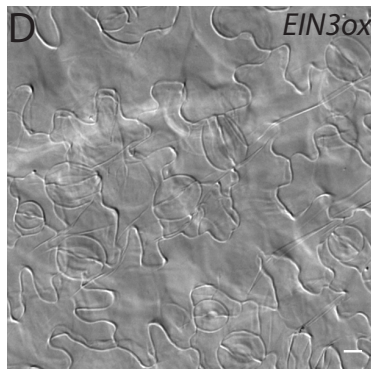

Supplement: supp [file elife_poa_e63335_Figure_3_figure_supplement_1.pdf › elife_poa_e63335_Figure_3_figure_supplement_1.pdf]

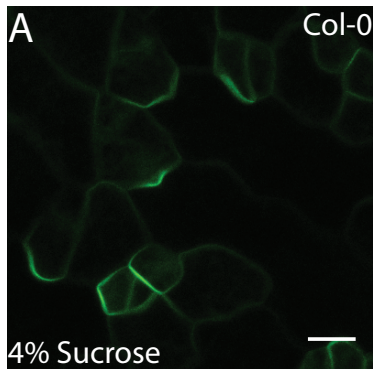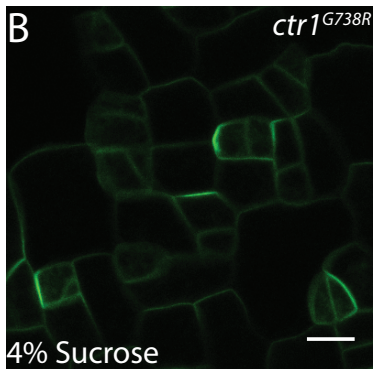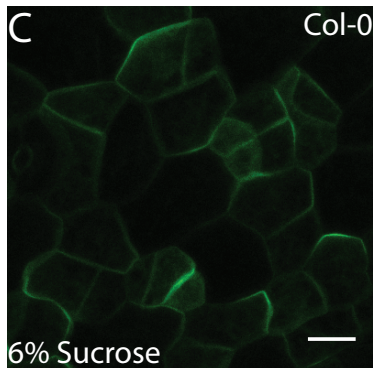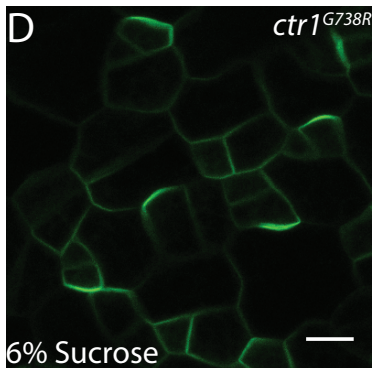

Supplement: supp [file elife_poa_e63335_Figure_4_figure_supplement_1.pdf › elife_poa_e63335_Figure_4_figure_supplement_1.pdf]

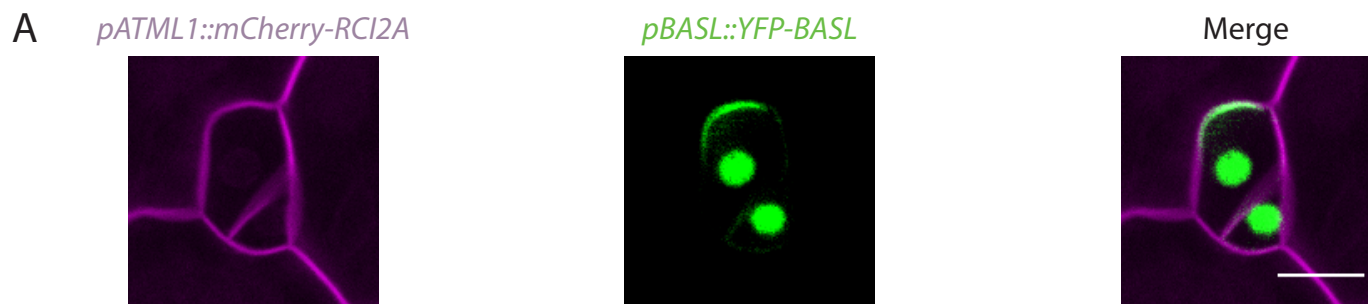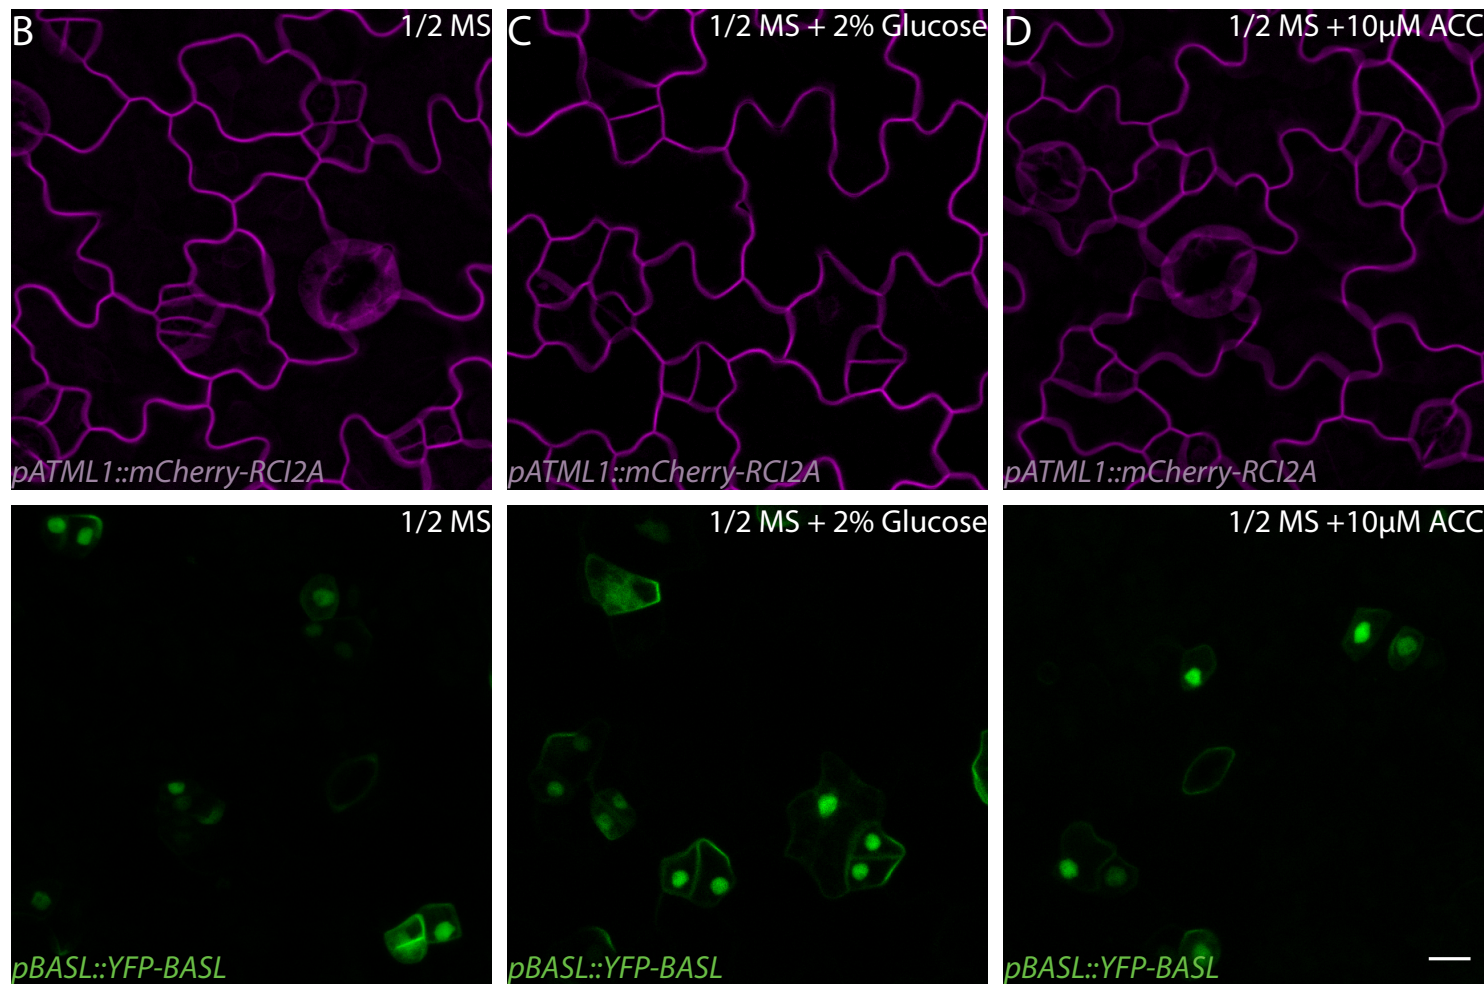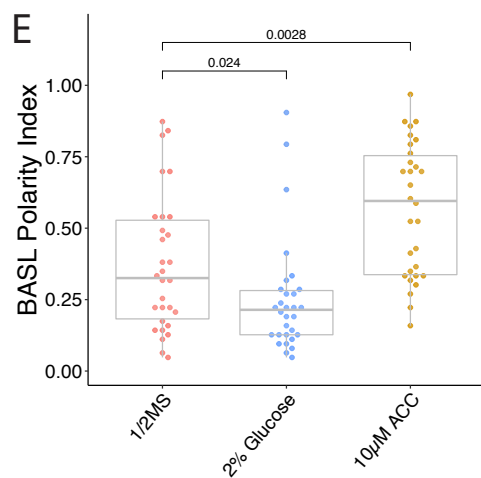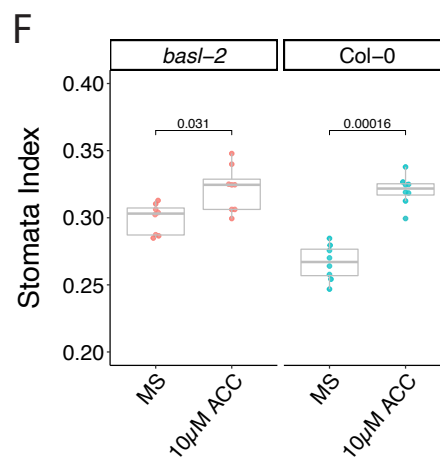

Supplement: supp [file elife_poa_e63335_Figure_4_figure_supplement_2.pdf › elife_poa_e63335_Figure_4_figure_supplement_2.pdf]

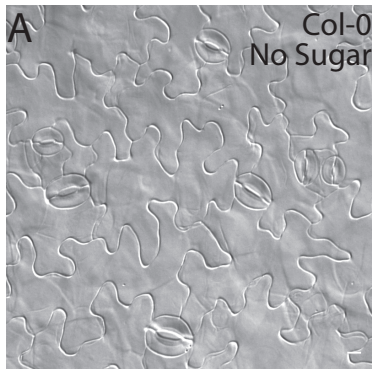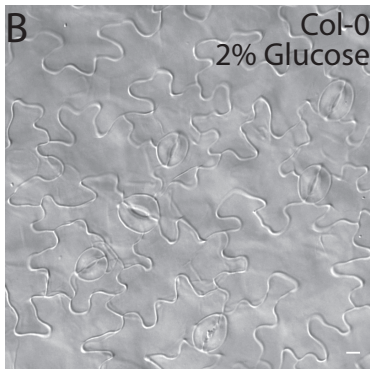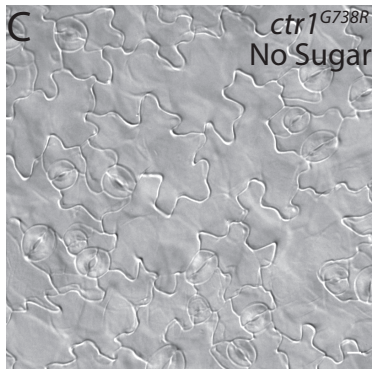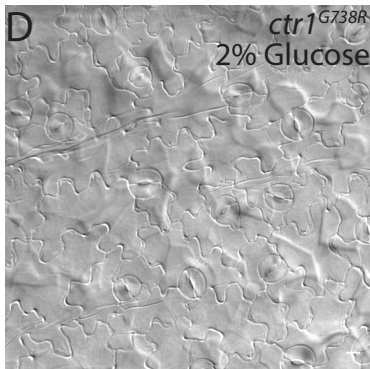

Supplement: supp [file elife_poa_e63335_Figure_5_figure_supplement_1.pdf › elife_poa_e63335_Figure_5_figure_supplement_1.pdf]

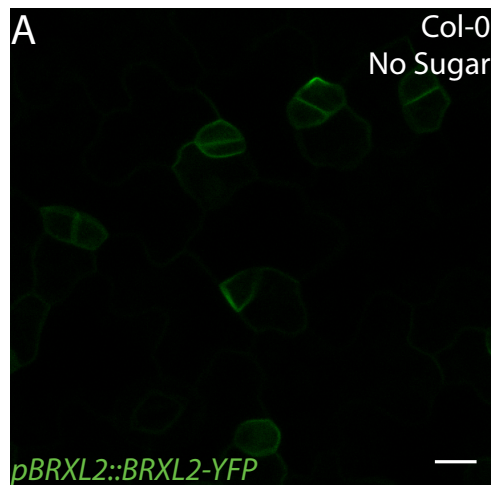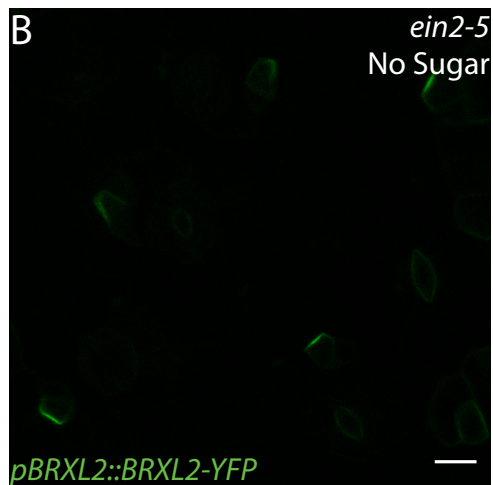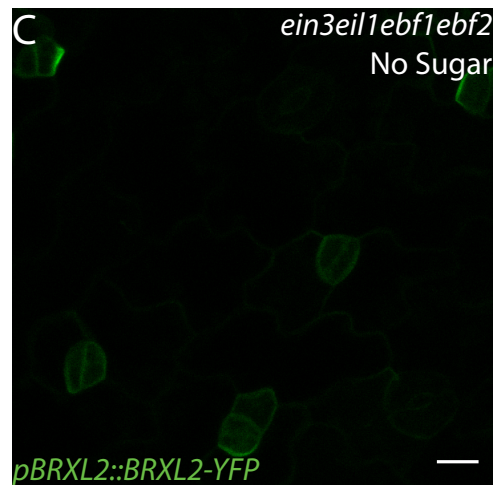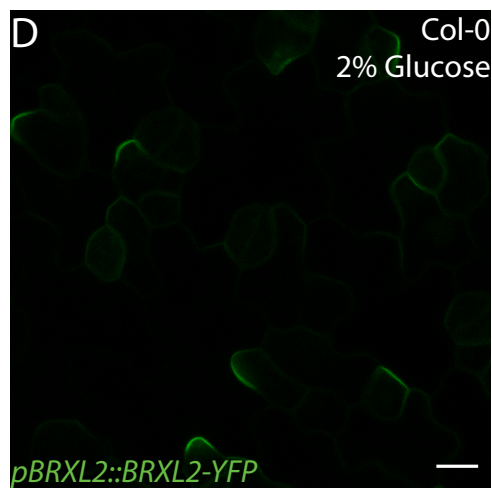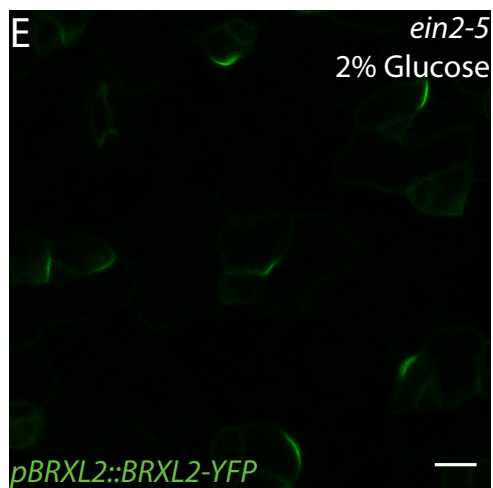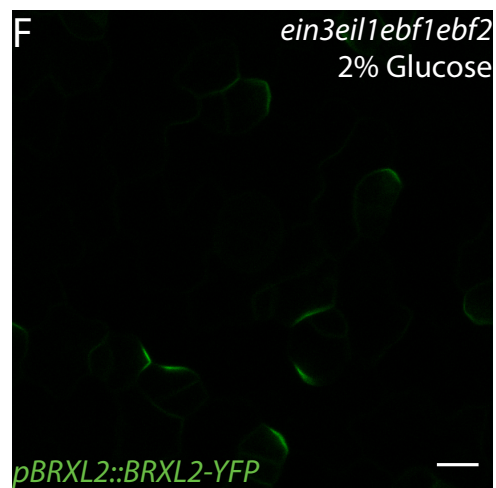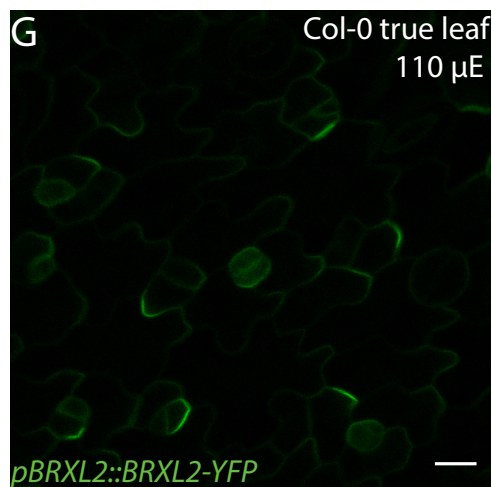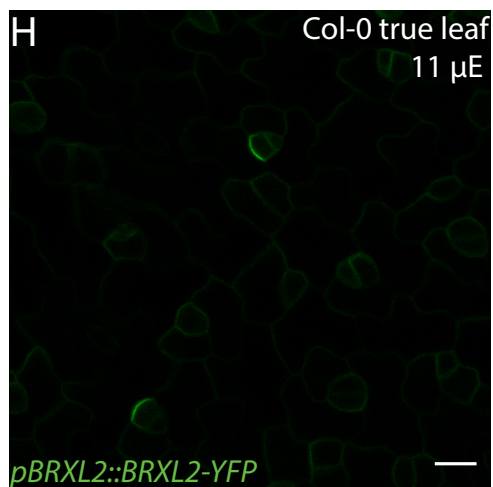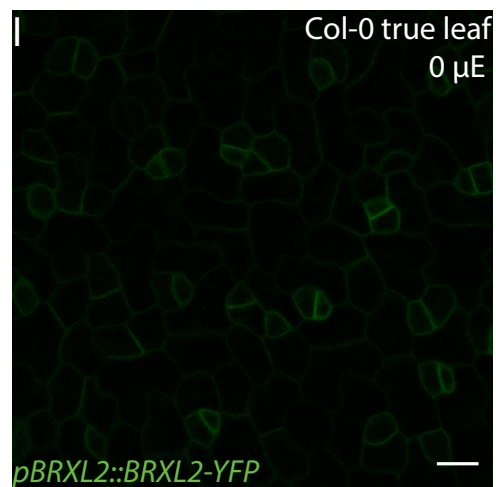

Supplement: supp [file elife_poa_e63335_Figure_5_figure_supplement_2.pdf › elife_poa_e63335_Figure_5_figure_supplement_2.pdf]

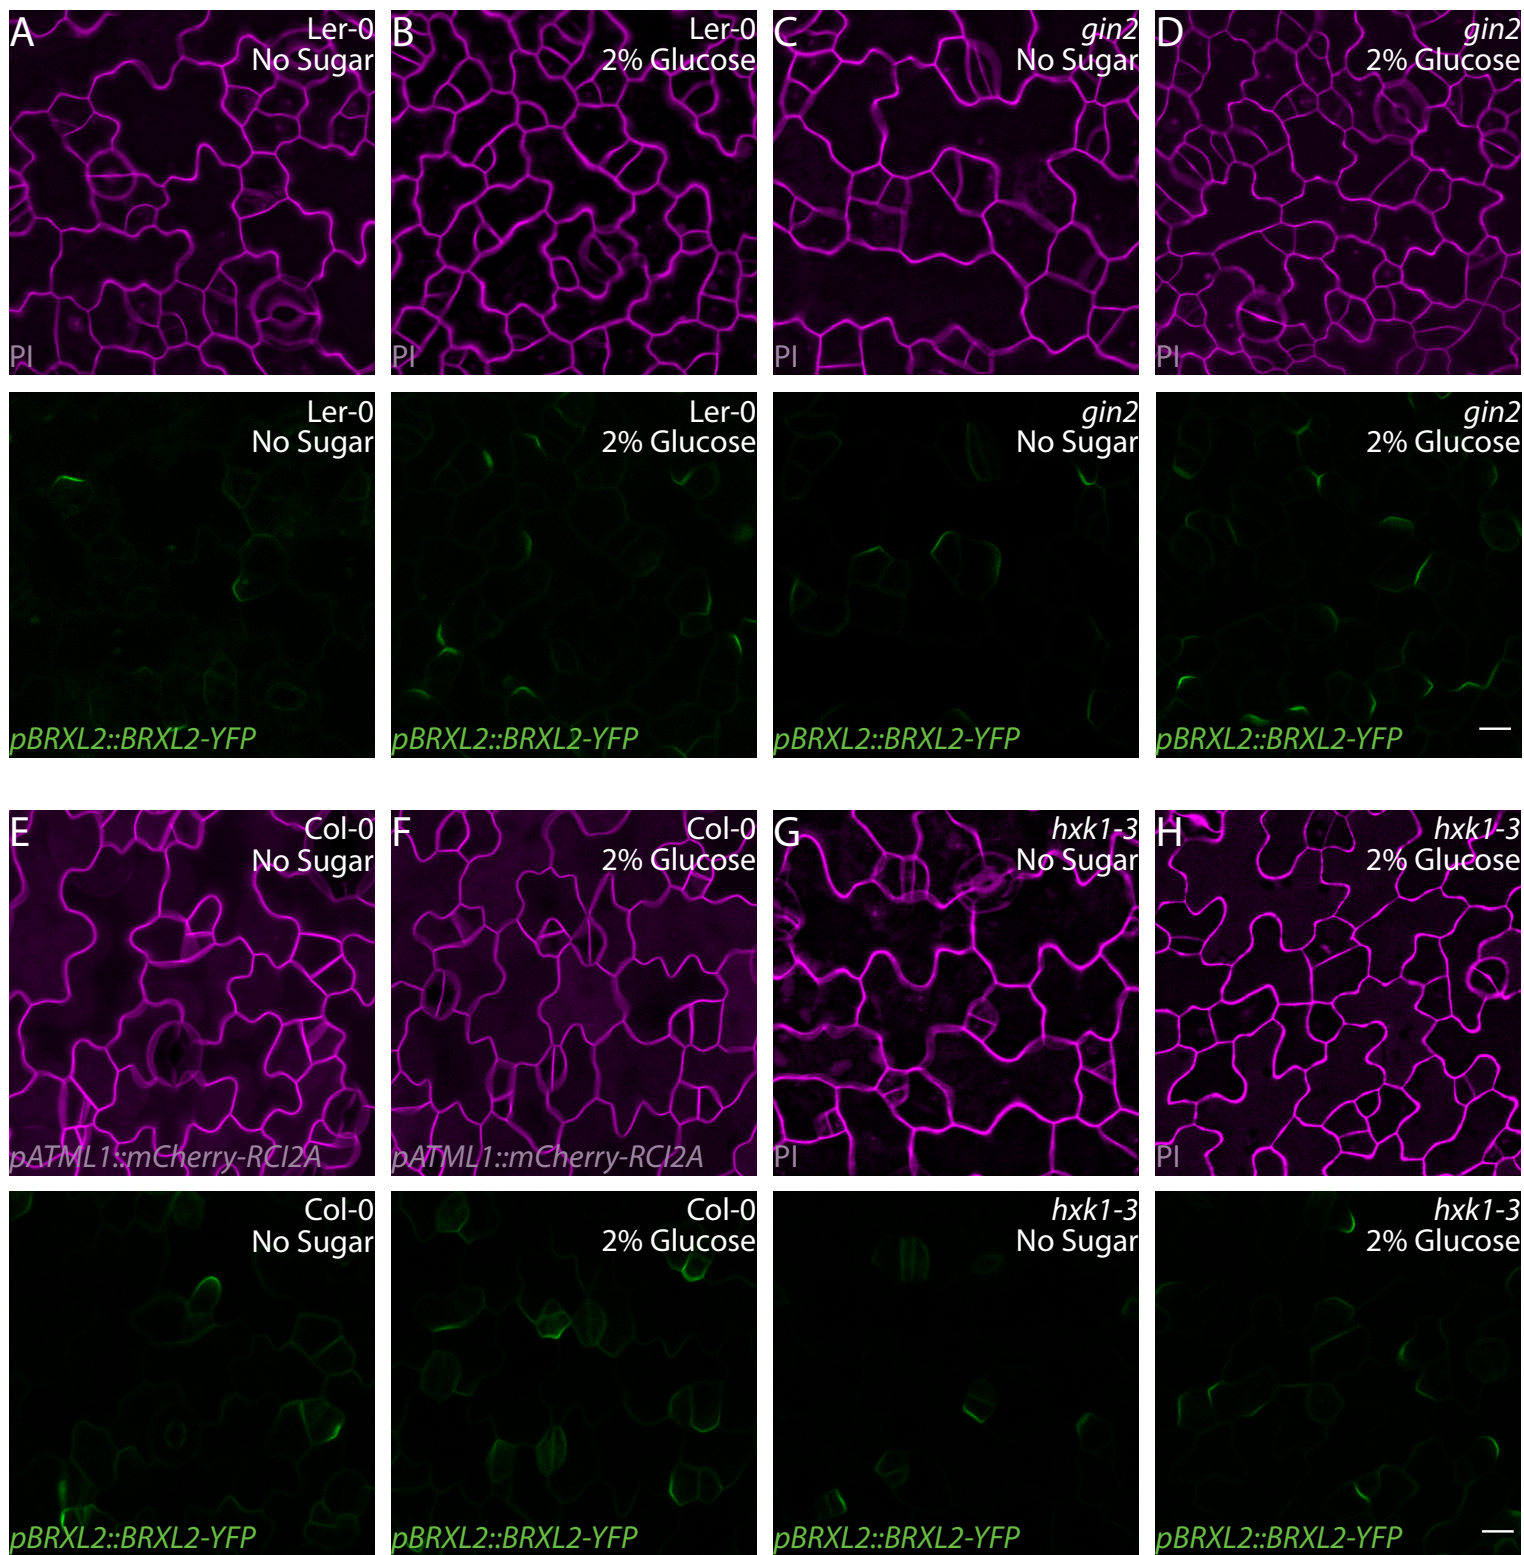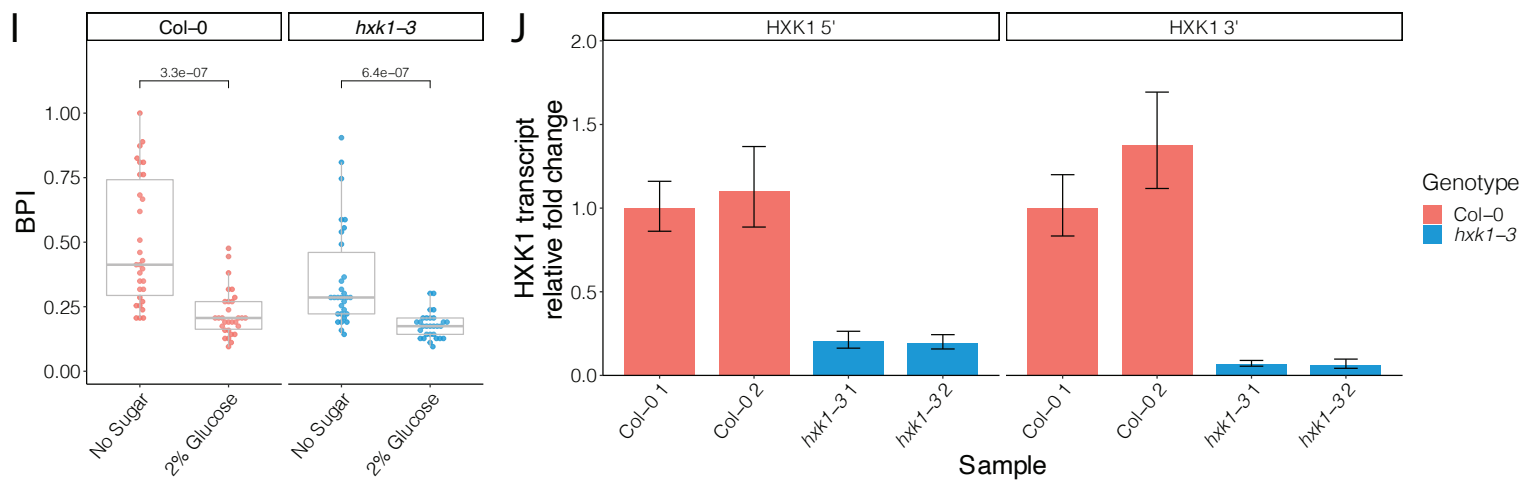

Supplement: supp [file elife_poa_e63335_Figure_5_figure_supplement_3.pdf › elife_poa_e63335_Figure_5_figure_supplement_3.pdf]

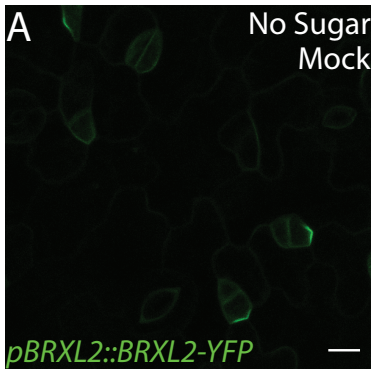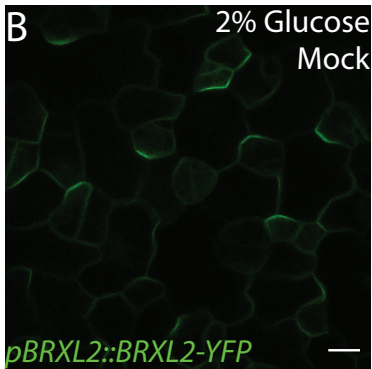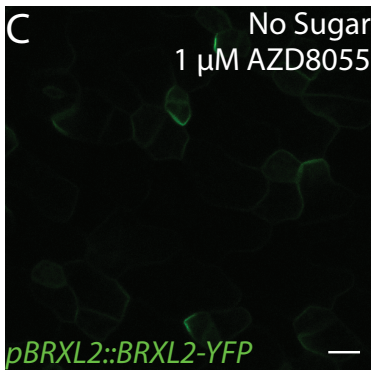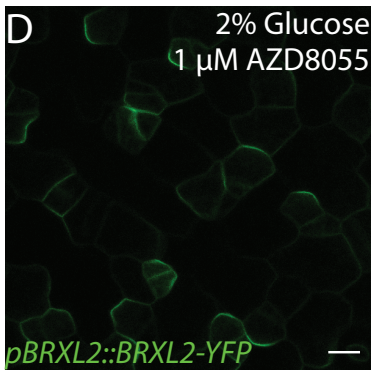

Supplement: supp [file elife_poa_e63335_Figure_5_figure_supplement_4.pdf › elife_poa_e63335_Figure_5_figure_supplement_4.pdf]

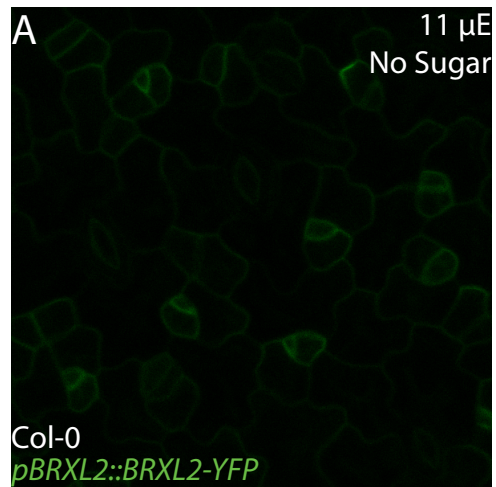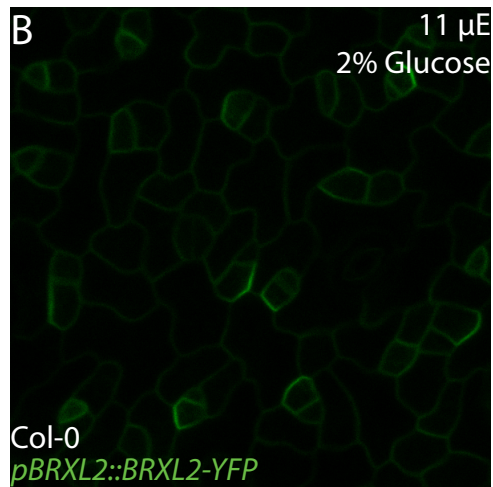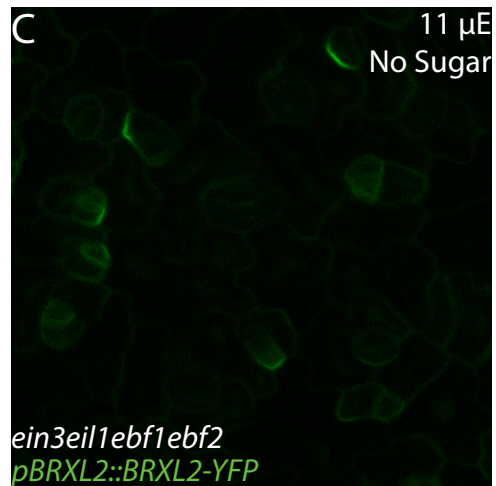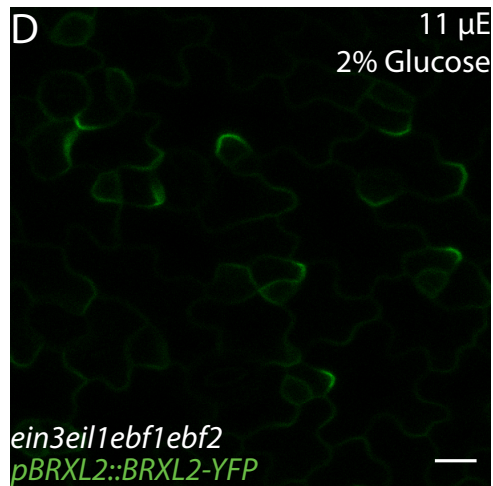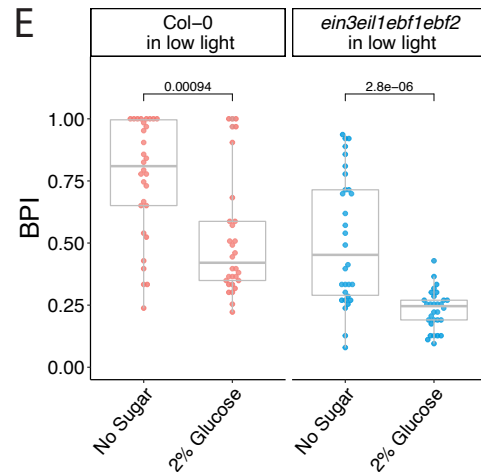

Supplement: supp [file elife_poa_e63335_Figure_5_figure_supplement_5.pdf › elife_poa_e63335_Figure_5_figure_supplement_5.pdf]

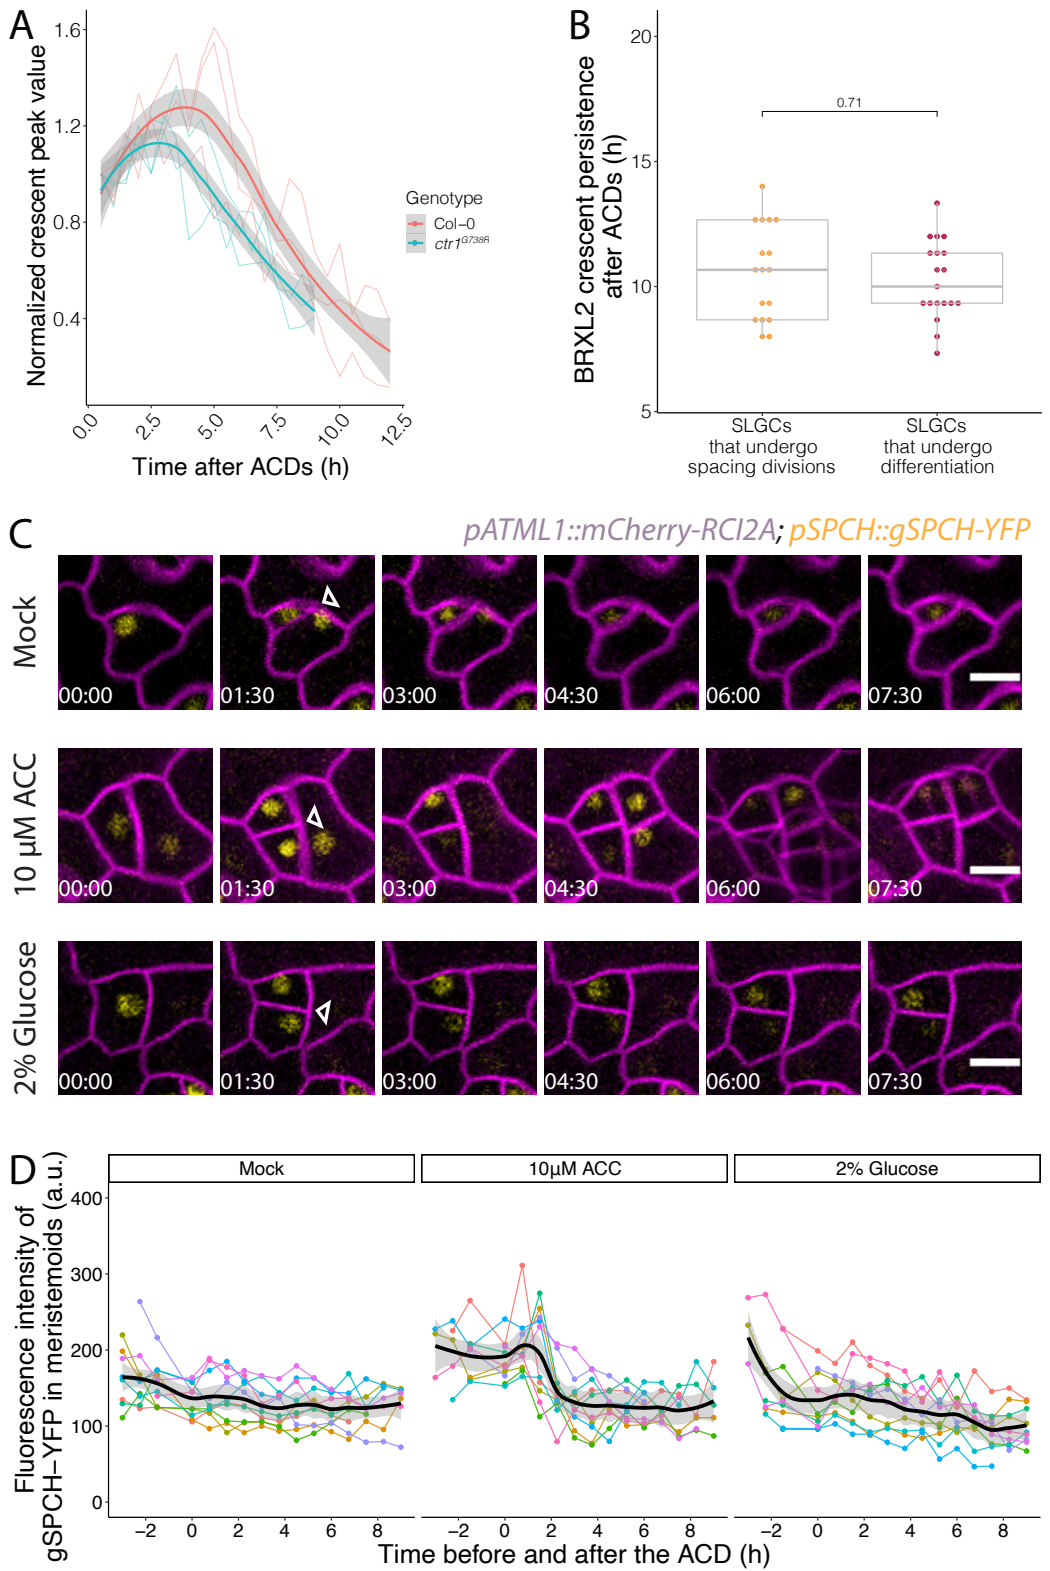

Supplement: supp [file elife_poa_e63335_Figure_6_figure_supplement_1.pdf › elife_poa_e63335_Figure_6_figure_supplement_1.pdf]
